# Supplementary material for: Global seismic energy scaling relationships based on the type of faulting
Source: Copernicus journal article supplement (doi:10.5194/se-15-229-2024), 2024-02-12
Supplement: Supplementary file 1 [file se-15-229-2024-supplement.pdf]

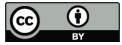

*Supplement of*

## **Global seismic energy scaling relationships based on the type of faulting**

**Quetzalcoatl Rodríguez-Pérez and F. Ramón Zúñiga**

*Correspondence to:* Quetzalcoatl Rodríguez-Pérez ([quetza@geociencias.unam.mx](mailto:quetza@geociencias.unam.mx))

The copyright of individual parts of the supplement might differ from the article licence.

## Supplementary Material

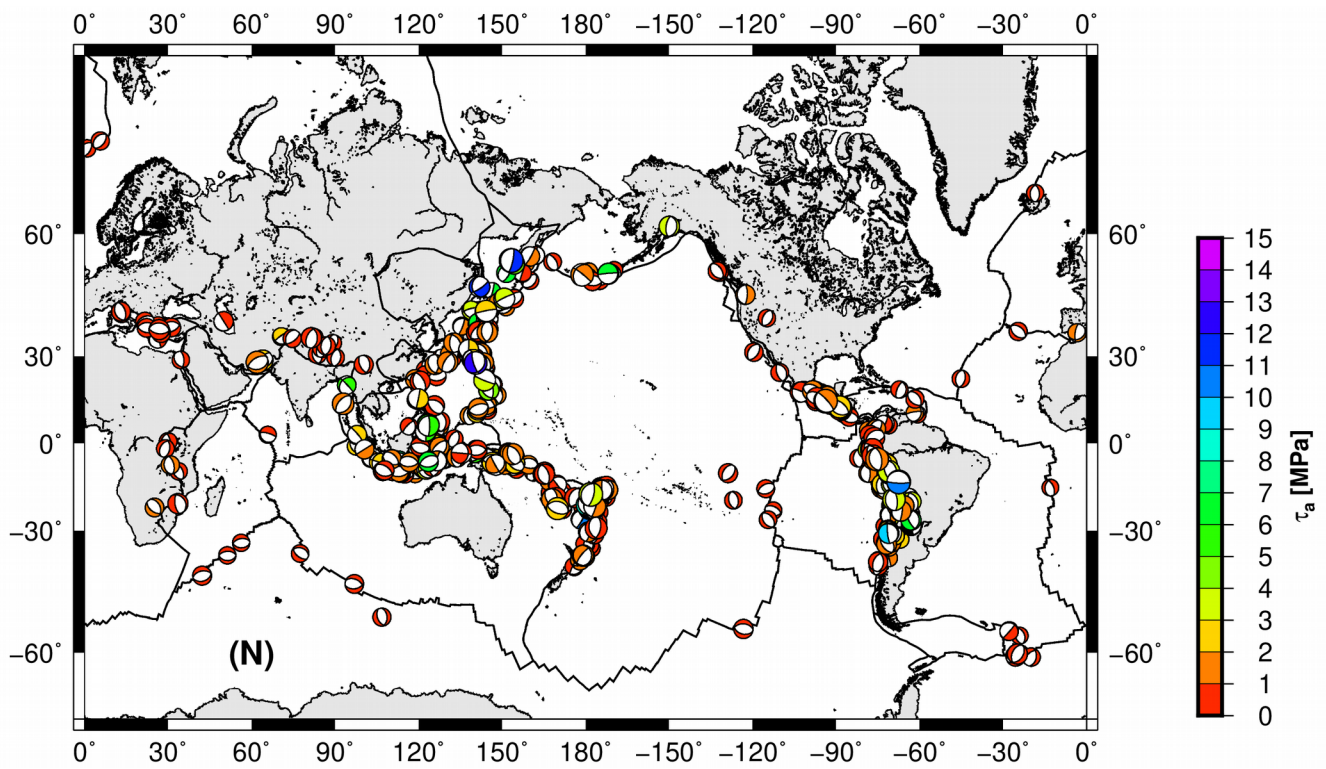

Figure S1. Spatial distribution of apparent stress for N events.

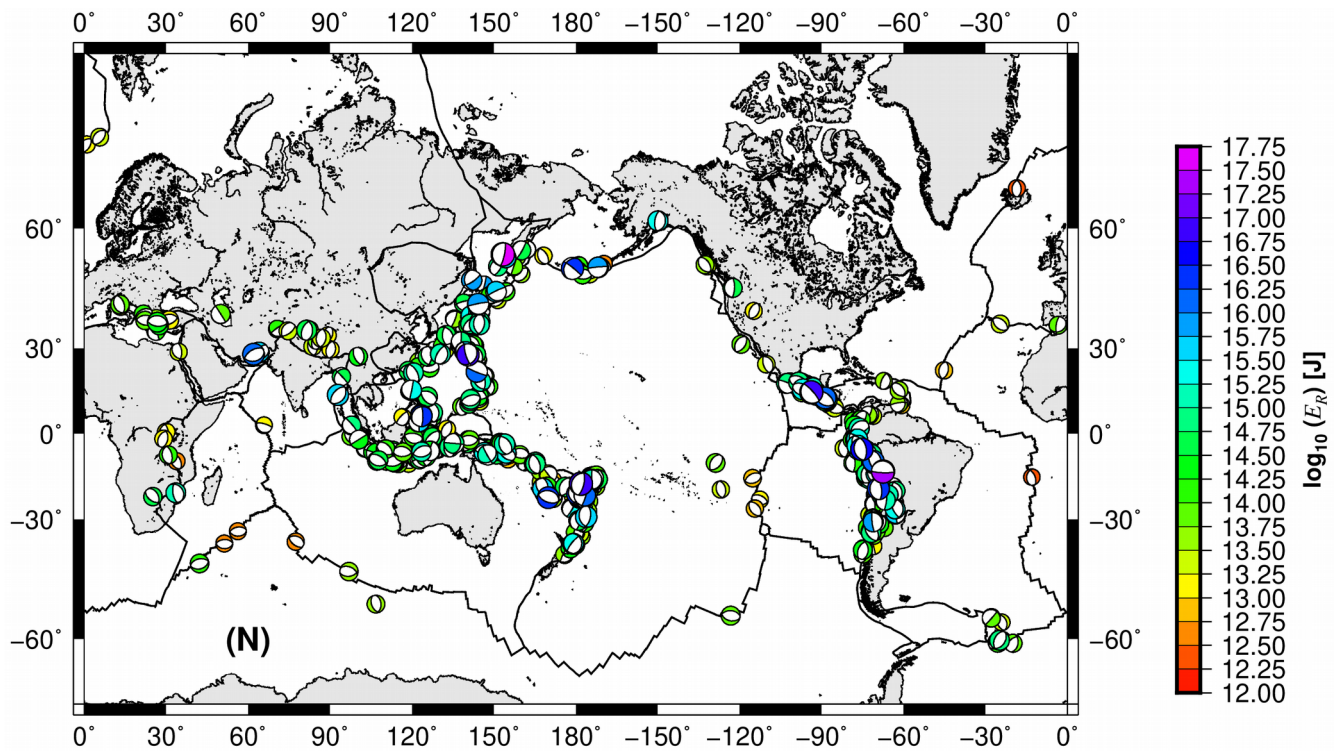

Figure S2. Spatial distribution of radiated seismic energy for N events.

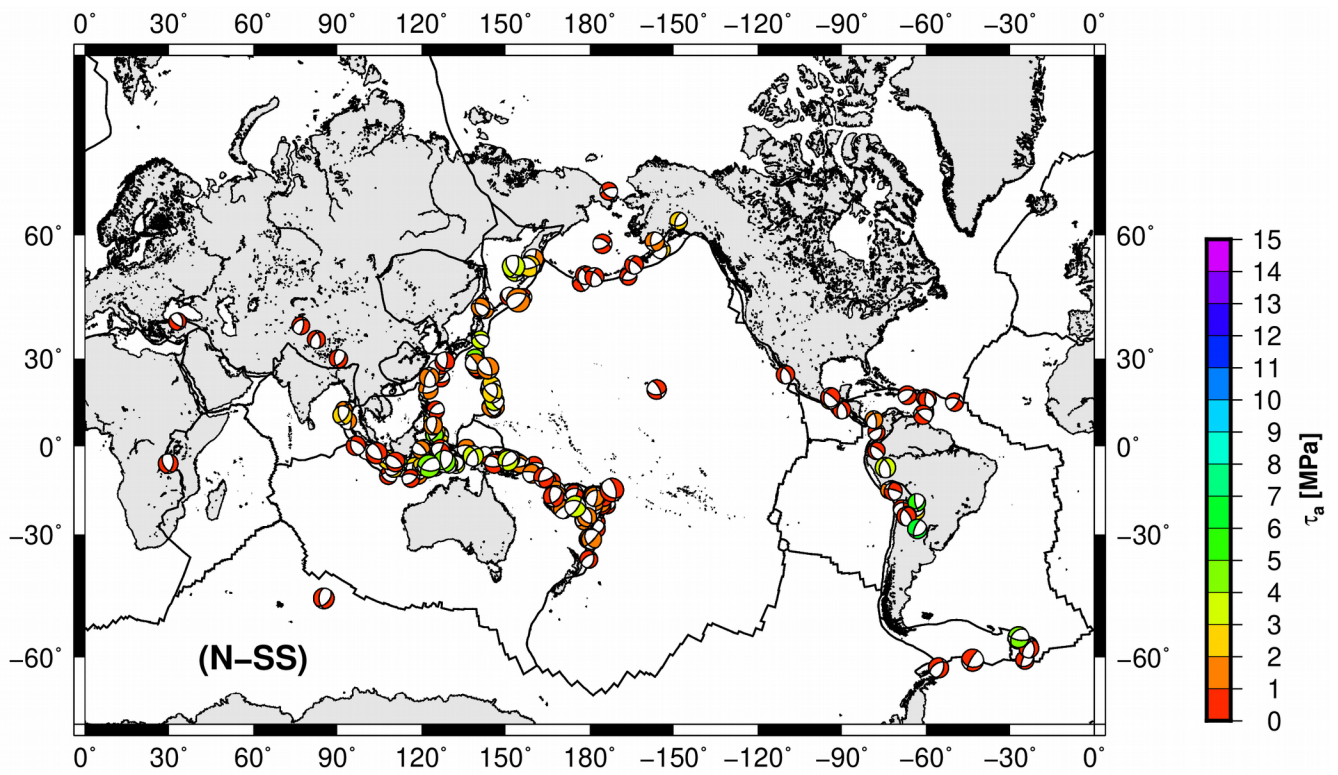

**Figure S3.** Spatial distribution of apparent stress for N-SS events.

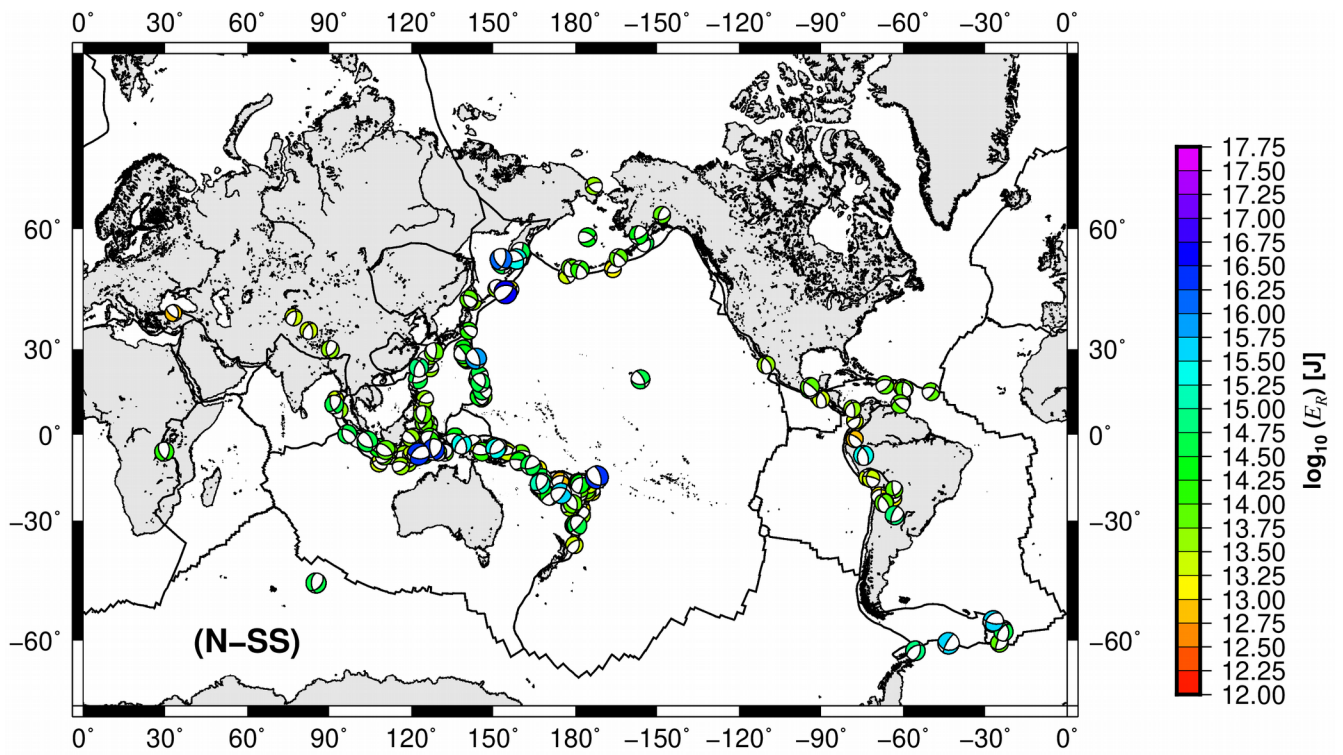

**Figure S4.** Spatial distribution of radiated seismic energy for N-SS events.



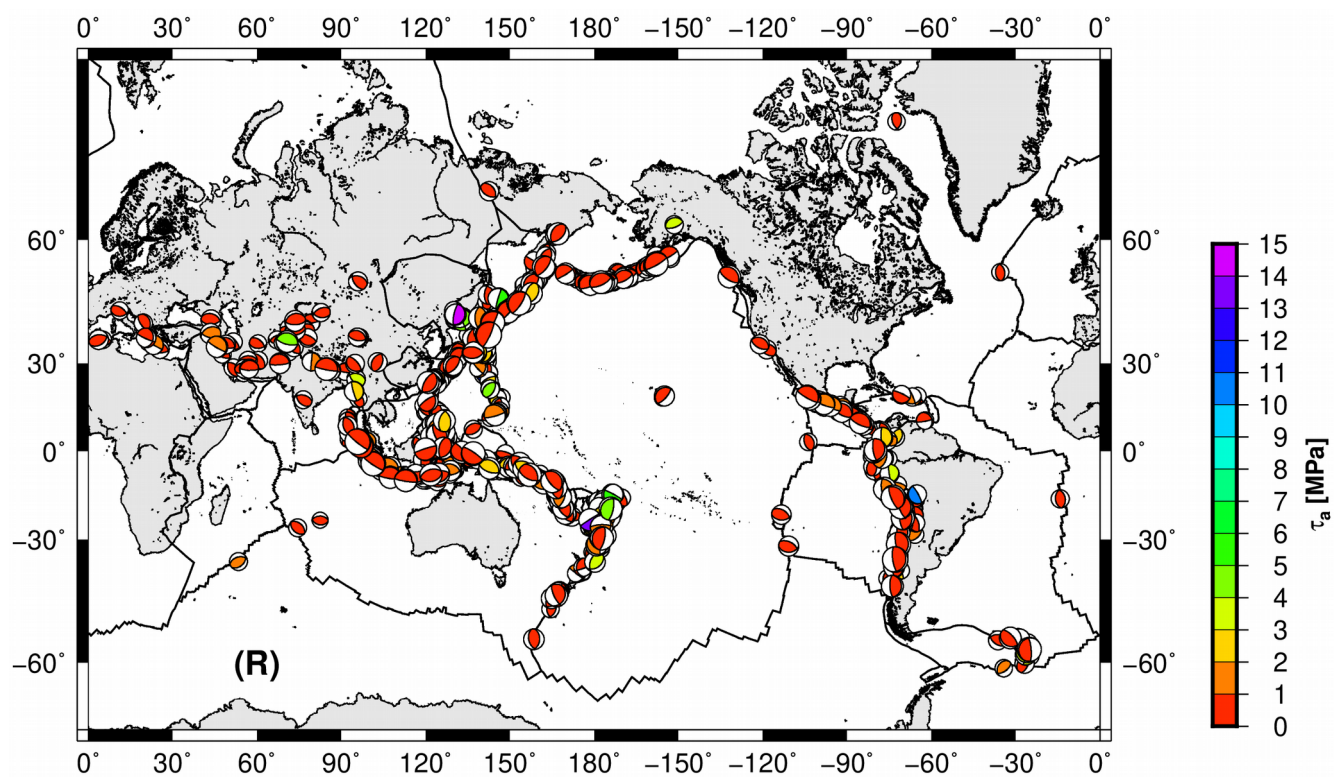

Figure S5. Spatial distribution of apparent stress for R events.

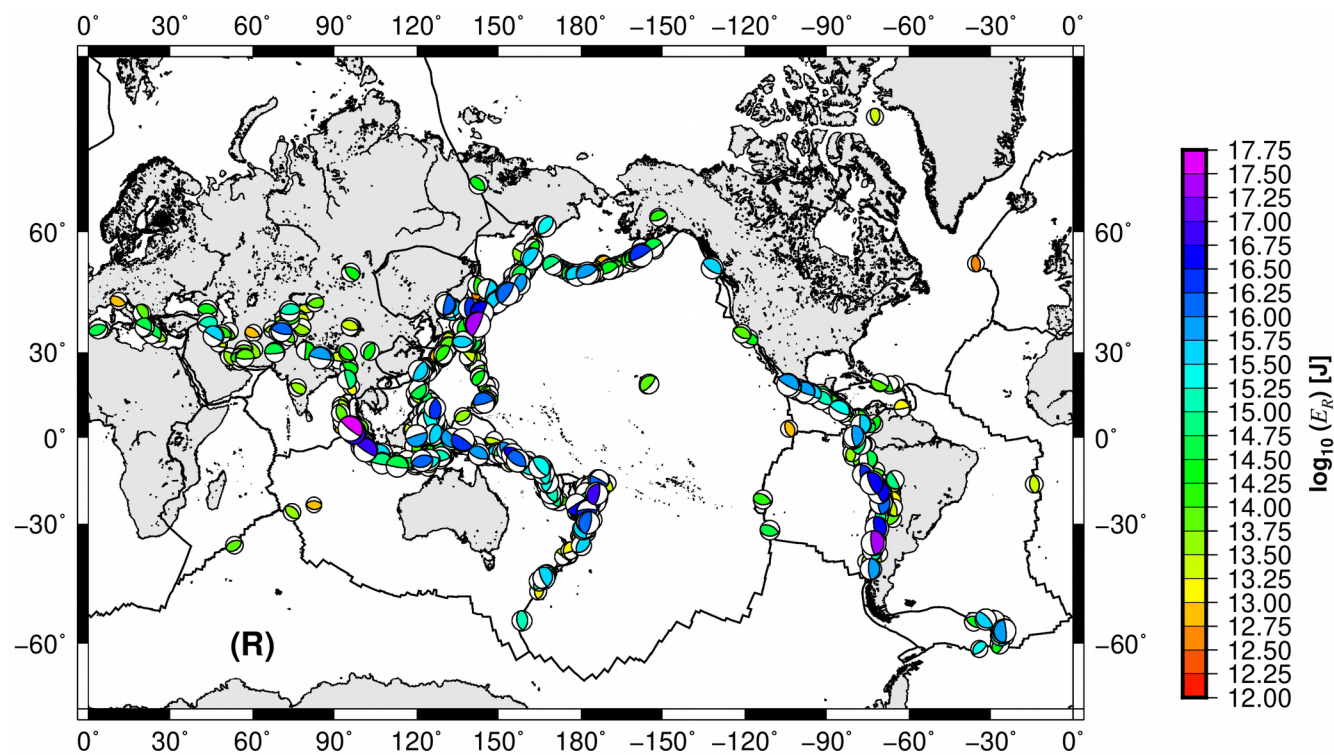

Figure S6. Spatial distribution of radiated seismic energy for R events.



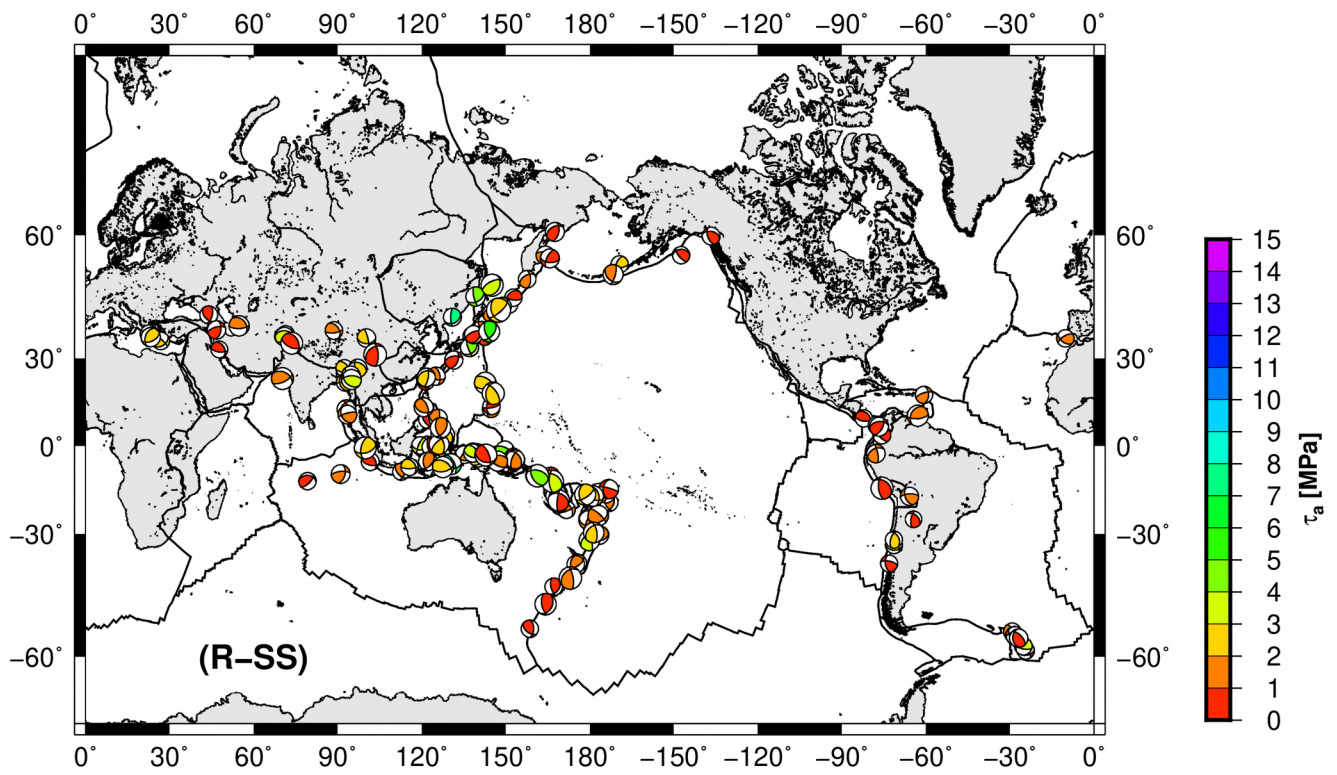

Figure S7. Spatial distribution of apparent stress for R-SS events.

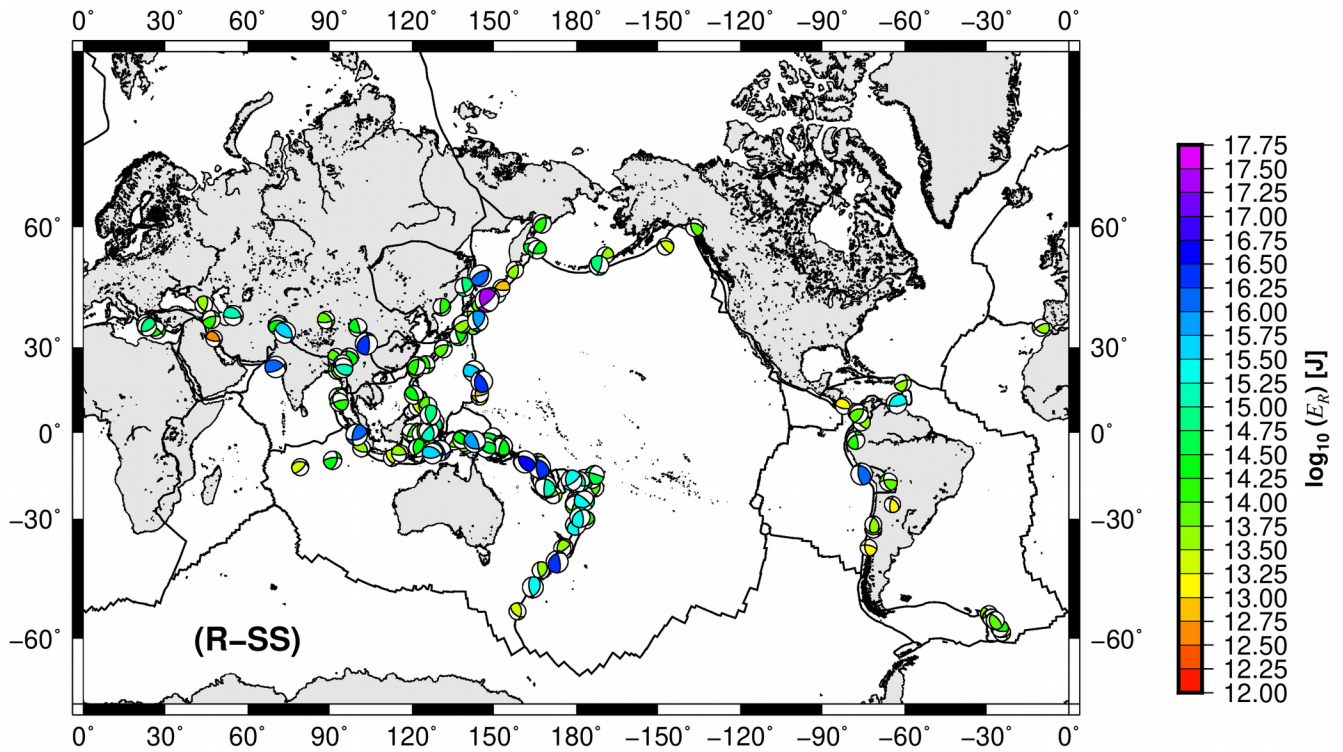

Figure S8. Spatial distribution of radiated seismic energy for R-SS events.

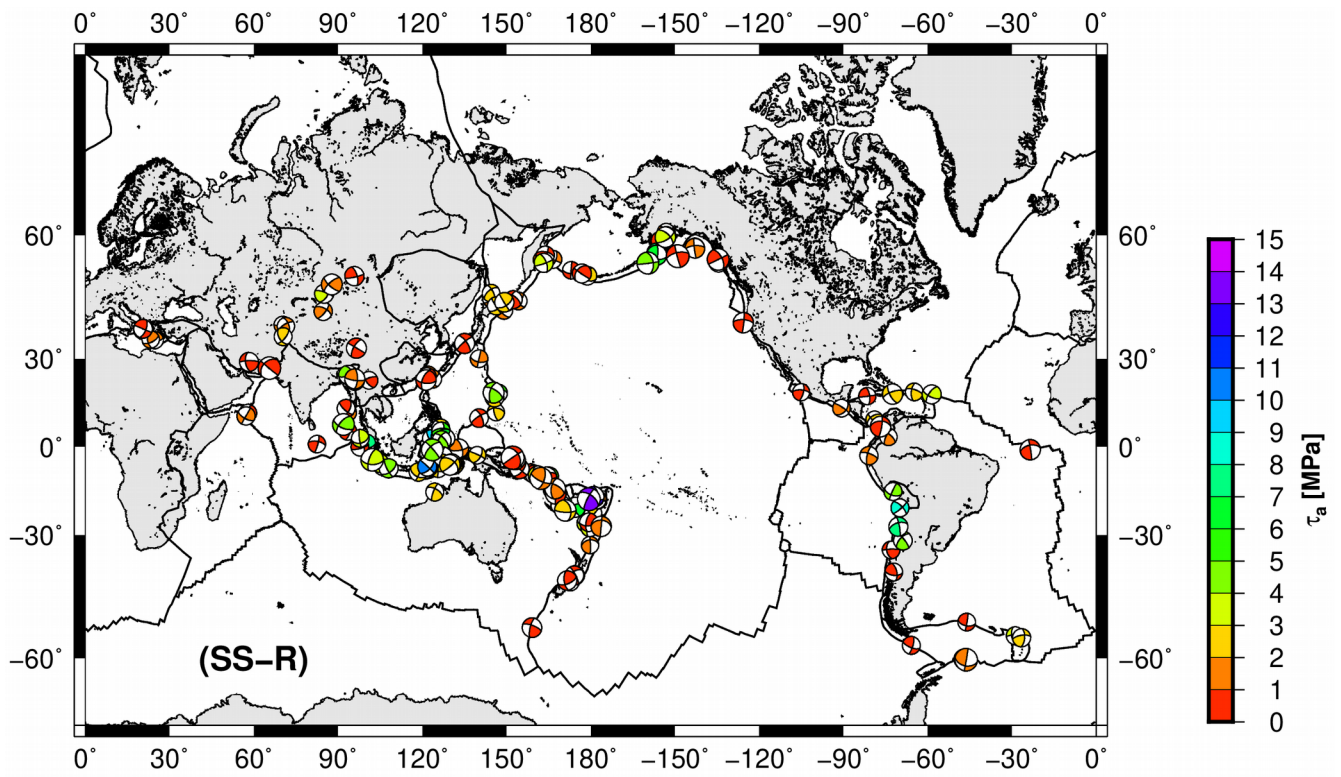

Figure S9. Spatial distribution of apparent stress for SS-R events.

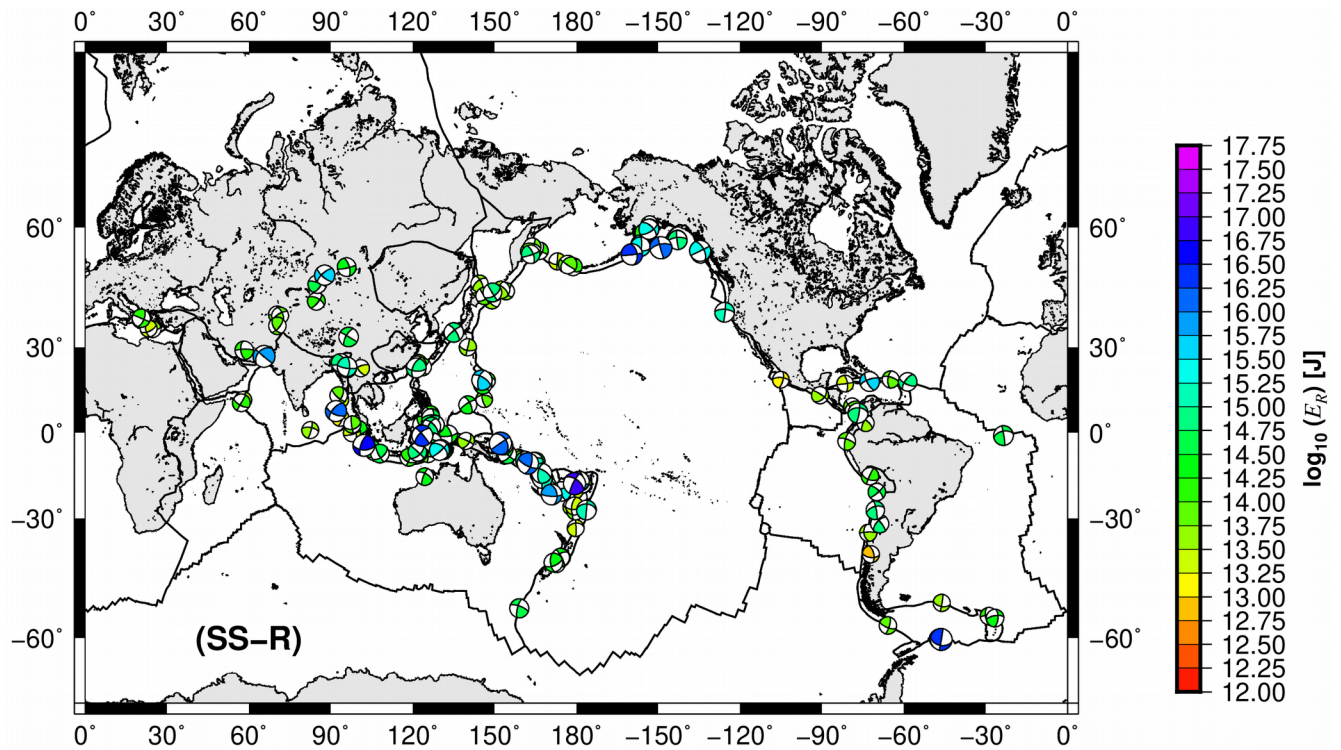

Figure S10. Spatial distribution of radiated seismic energy for SS-R events.



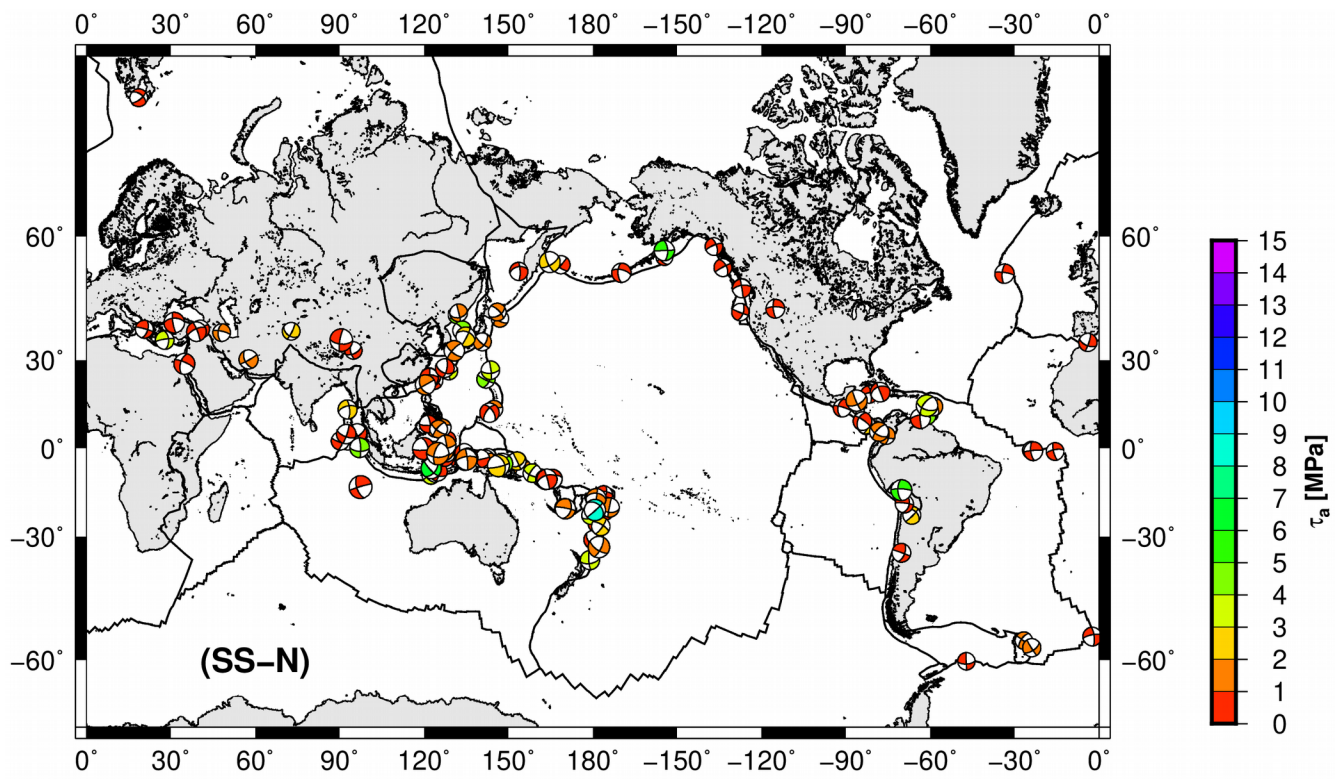

Figure S11. Spatial distribution of apparent stress for SS-N events.

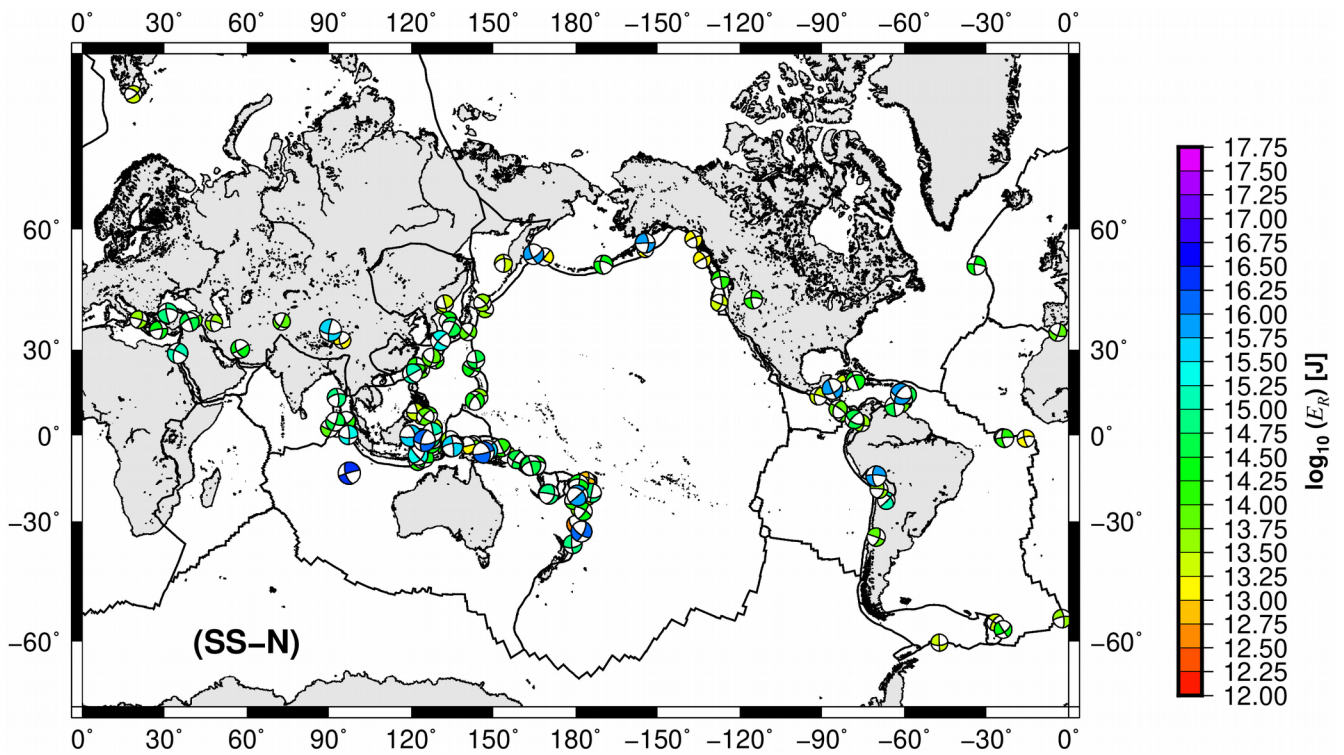

Figure S12. Spatial distribution of radiated seismic energy for SS-N events.



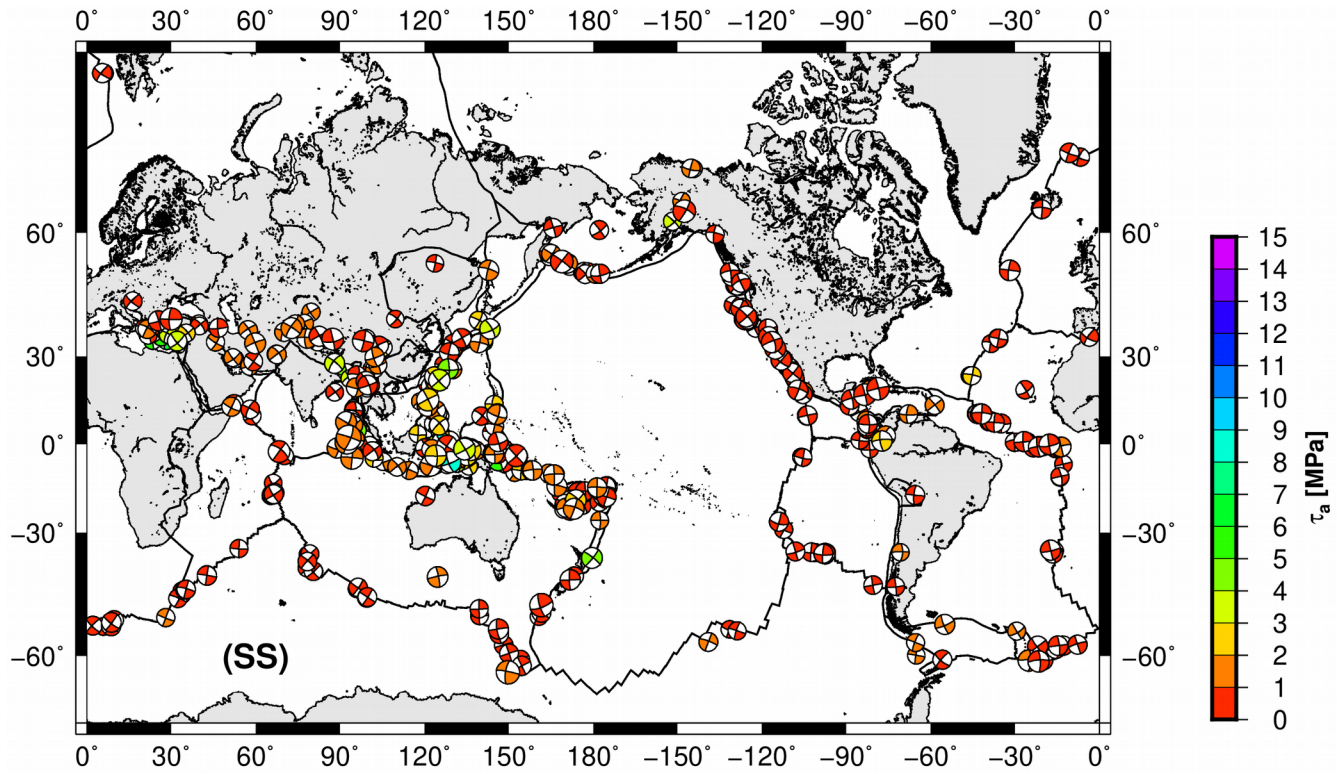

Figure S13. Spatial distribution of apparent stress for SS events.

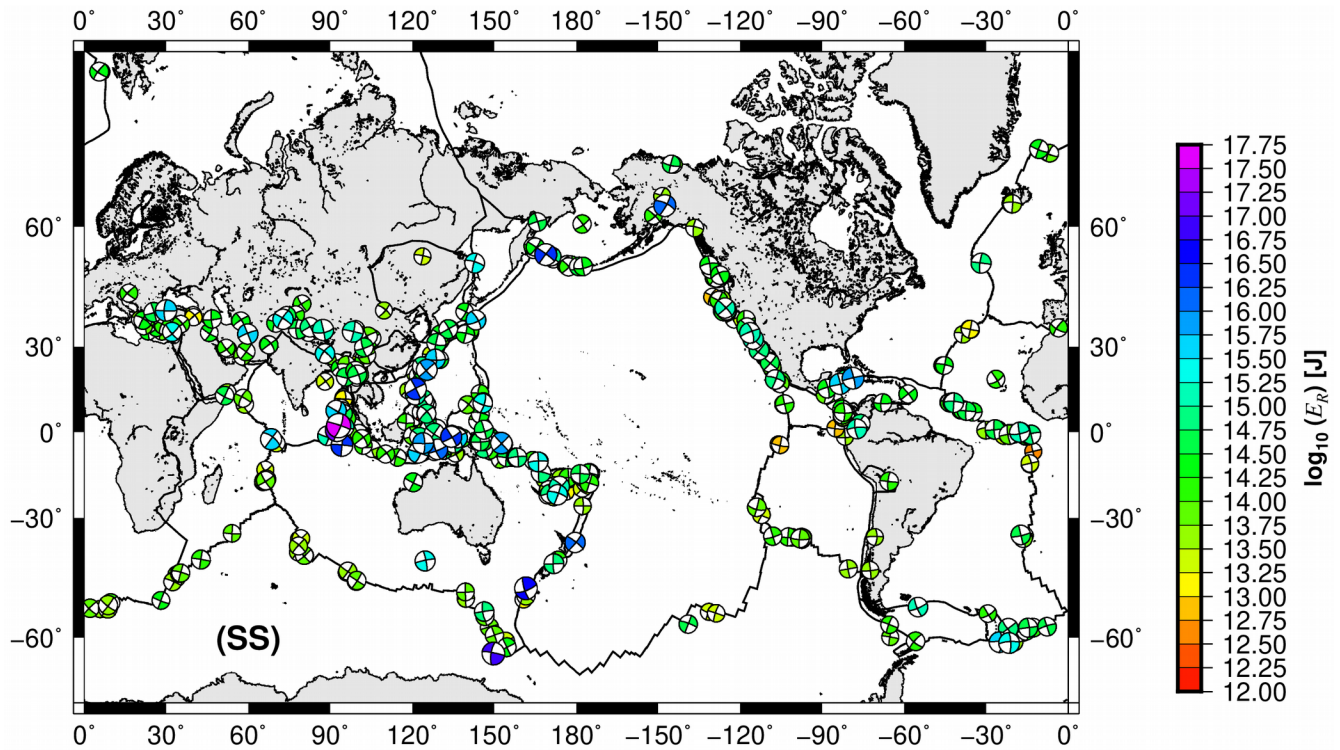

Figure S14. Spatial distribution of radiated seismic energy for SS events.

**Table S1.** T-test for finite-fault energy estimations of N events ( $Z < 30$  km). In this and the following tables,  $p$  values which indicate a rejection of the null hypothesis based on 95% confidence ( $< 0.05$ ), are highlighted in red.

|           | $E_{mrt}$            | $E_U$                | $E_O$ |
|-----------|----------------------|----------------------|-------|
| $E_{mrt}$ | X                    |                      |       |
| $E_U$     | 0.0008               | X                    |       |
| $E_O$     | $< 1 \times 10^{-4}$ | $< 1 \times 10^{-6}$ | X     |

**Table S2.** T-test for finite-fault energy estimations of R events ( $Z = 30$  km).

|           | $E_{mrt}$             | $E_U$                 | $E_O$ |
|-----------|-----------------------|-----------------------|-------|
| $E_{mrt}$ | X                     |                       |       |
| $E_U$     | $< 1 \times 10^{-12}$ | X                     |       |
| $E_O$     | $< 1 \times 10^{-9}$  | $< 1 \times 10^{-30}$ | X     |

**Table S3.** T-test for finite-fault energy estimations of SS events ( $Z = 30$  km).

| $E_{mrt}$ | X      |                      |   |
|-----------|--------|----------------------|---|
| $E_U$     | 0.0038 | X                    |   |
| $E_O$     | 0.0058 | $< 1 \times 10^{-6}$ | X |

**Table S4.** T-test for  $E_R/M_0$  for  $Z < 30$  km.

|      | N                     | N-SS                 | R                     | R-SS   | SS     | SS-N   | SS-R |
|------|-----------------------|----------------------|-----------------------|--------|--------|--------|------|
| N    | X                     |                      |                       |        |        |        |      |
| N-SS | 0.0005                | X                    |                       |        |        |        |      |
| R    | 0.0007                | $< 1 \times 10^{-8}$ | X                     |        |        |        |      |
| R-SS | $< 1 \times 10^{-5}$  | 0.4336               | $< 1 \times 10^{-13}$ | X      |        |        |      |
| SS   | $< 1 \times 10^{-9}$  | 0.2416               | $< 1 \times 10^{-32}$ | 0.5917 | X      |        |      |
| SS-N | $< 1 \times 10^{-11}$ | 0.0189               | $< 1 \times 10^{-26}$ | 0.0687 | 0.1082 | X      |      |
| SS-R | $< 1 \times 10^{-6}$  | 0.2322               | $< 1 \times 10^{-16}$ | 0.4814 | 0.6954 | 0.4013 | X    |

**Table S5.** T-test for  $E_R/M_0$  for  $30 < Z < 60$  km.

|      | N                    | N-SS                 | R                     | R-SS   | SS     | SS-N   | SS-R |
|------|----------------------|----------------------|-----------------------|--------|--------|--------|------|
| N    | X                    |                      |                       |        |        |        |      |
| N-SS | 0.2576               | X                    |                       |        |        |        |      |
| R    | $< 1 \times 10^{-6}$ | $< 1 \times 10^{-5}$ | X                     |        |        |        |      |
| R-SS | 0.2006               | 0.6872               | $< 1 \times 10^{-13}$ | X      |        |        |      |
| SS   | 0.7375               | 0.0904               | $< 1 \times 10^{-32}$ | 0.5917 | X      |        |      |
| SS-N | 0.0196               | 0.4538               | $< 1 \times 10^{-26}$ | 0.0687 | 0.1082 | X      |      |
| SS-R | $< 1 \times 10^{-4}$ | 0.0255               | $< 1 \times 10^{-16}$ | 0.4814 | 0.6954 | 0.4013 | X    |

**Table S6.** T-test for  $E_R/M_0$  for  $60 < Z < 90$  km.

|      | N                    | N-SS | R                     | R-SS   | SS | SS-N   | SS-R |
|------|----------------------|------|-----------------------|--------|----|--------|------|
| N    | X                    |      |                       |        |    |        |      |
| N-SS | X                    | X    |                       |        |    |        |      |
| R    | $< 1 \times 10^{-4}$ | X    | X                     |        |    |        |      |
| R-SS | 0.8664               | X    | 0.0026                | X      |    |        |      |
| SS   | X                    | X    | X                     | X      | X  |        |      |
| SS-N | 0.9564               | X    | 0.0017                | 0.8658 | X  | X      |      |
| SS-R | 0.0015               | X    | $< 1 \times 10^{-11}$ | 0.0151 | X  | 0.0268 | X    |

**Table S7.** T-test for  $E_R/M_0$  for  $90 < Z < 120$  km.

|      | N      | N-SS | R      | R-SS   | SS | SS-N | SS-R |
|------|--------|------|--------|--------|----|------|------|
| N    | X      |      |        |        |    |      |      |
| N-SS | X      | X    |        |        |    |      |      |
| R    | 0.9428 | X    | X      |        |    |      |      |
| R-SS | 0.0371 | X    | 0.1112 | X      |    |      |      |
| SS   | X      | X    | X      | X      | X  |      |      |
| SS-N | X      | X    | X      | X      | X  | X    |      |
| SS-R | 0.0401 | X    | 0.0665 | 0.9383 | X  | X    | X    |



**Table S8.** T-test for  $E_R/M_0$  for  $120 < Z < 150$  km.

|      | N      | N-SS | R      | R-SS   | SS | SS-N | SS-R |
|------|--------|------|--------|--------|----|------|------|
| N    | X      |      |        |        |    |      |      |
| N-SS | X      | X    |        |        |    |      |      |
| R    | 0.9428 | X    | X      |        |    |      |      |
| R-SS | 0.0371 | X    | 0.1112 | X      |    |      |      |
| SS   | X      | X    | X      | X      | X  |      |      |
| SS-N | X      | X    | X      | X      | X  | X    |      |
| SS-R | 0.0401 | X    | 0.0665 | 0.9382 | X  | X    | X    |

**Table S9.** T-test for  $E_R/M_0$  for  $150 < Z < 180$  km.

|      | N      | N-SS | R | R-SS | SS | SS-N | SS-R |
|------|--------|------|---|------|----|------|------|
| N    | X      |      |   |      |    |      |      |
| N-SS | X      | X    |   |      |    |      |      |
| R    | 0.6854 | X    | X |      |    |      |      |
| R-SS | X      | X    | X | X    |    |      |      |
| SS   | X      | X    | X | X    | X  |      |      |
| SS-N | X      | X    | X | X    | X  | X    |      |
| SS-R | X      | X    | X | X    | X  | X    | X    |

**Table S10.** T-test for  $E_R/M_0$  for  $Z > 180$  km.

|      | N      | N-SS | R | R-SS | SS | SS-N | SS-R |
|------|--------|------|---|------|----|------|------|
| N    | X      |      |   |      |    |      |      |
| N-SS | X      | X    |   |      |    |      |      |
| R    | 0.2014 | X    | X |      |    |      |      |
| R-SS | X      | X    | X | X    |    |      |      |
| SS   | X      | X    | X | X    | X  |      |      |
| SS-N | X      | X    | X | X    | X  | X    |      |
| SS-R | X      | X    | X | X    | X  | X    | X    |
